# Supplementary material for: Magnetic Fe3O4@silica sulfuric acid nanoparticles promoted regioselective protection/deprotection of alcohols with dihydropyran under solvent-free conditions
Source: Royal Society of Chemistry journal article supplement (doi:10.1039/c7ra12458a), 2017-01-01
Supplement: c7ra12458a1.pdf [file c7ra12458a1.pdf]

## SUPPLEMENTARY DATA FOR

### **Magnetic Fe<sub>3</sub>O<sub>4</sub> @ silica sulfuric acid nanoparticles promoted regioselective protection/deprotection of alcohols with dihydropyran under solvent-free conditions**

Kalyani Rajkumari, Juri Kalita, Diparjun Das and Samuel Lalthazuala Rokhum\*

*Department of Chemistry, National Institute of Technology, Silchar, Silchar-788010, Assam, India*

\*Corresponding author. Tel.: +91 3842 242915; fax: +91 3842-224797; Email address: [rokhum@che.nits.ac.in](mailto:rokhum@che.nits.ac.in)

### **Table of Content**

|                                                                                                           |    |
|-----------------------------------------------------------------------------------------------------------|----|
| <sup>1</sup> H NMR and <sup>13</sup> C NMR Spectra of 2-((4-Methylbenzyl)oxy)tetrahydro-2H-pyran (2)----- | S2 |
| <sup>1</sup> H NMR and <sup>13</sup> C NMR Spectra of 2-(4-Methoxybenzyloxy)-tetrahydro-2H-pyran (3)----- | S3 |
| <sup>1</sup> H NMR and <sup>13</sup> C NMR Spectra of tetrahydro-2-(Phenethyloxy)-2H-pyran (6)-----       | S4 |
| <sup>1</sup> H NMR and <sup>13</sup> C NMR Spectra of 2-(2-Ethylhexyloxy)-tetrahydro-2H-pyran (7)-----    | S5 |
| <sup>1</sup> H NMR and <sup>13</sup> C NMR Spectra of 2-(8-Methylnonyloxy)-tetrahydro-2H-pyran (8)-----   | S6 |
| <sup>1</sup> H NMR and <sup>13</sup> C NMR Spectra of 2-(Octyloxy)tetrahydro-2H-pyran (9)-----            | S7 |

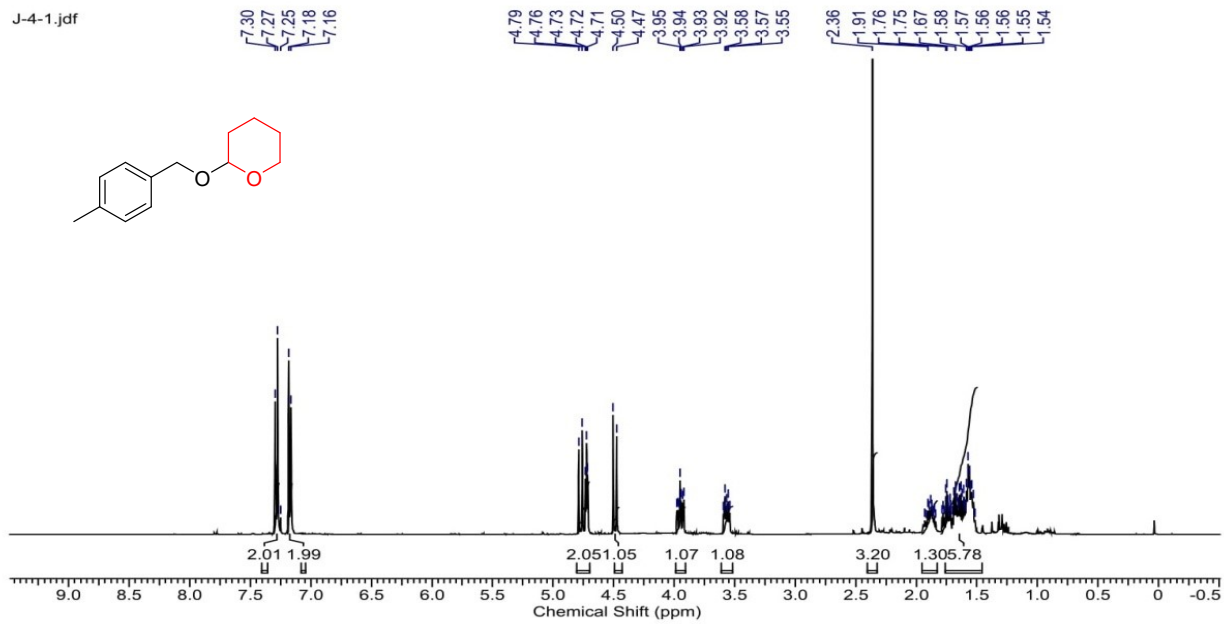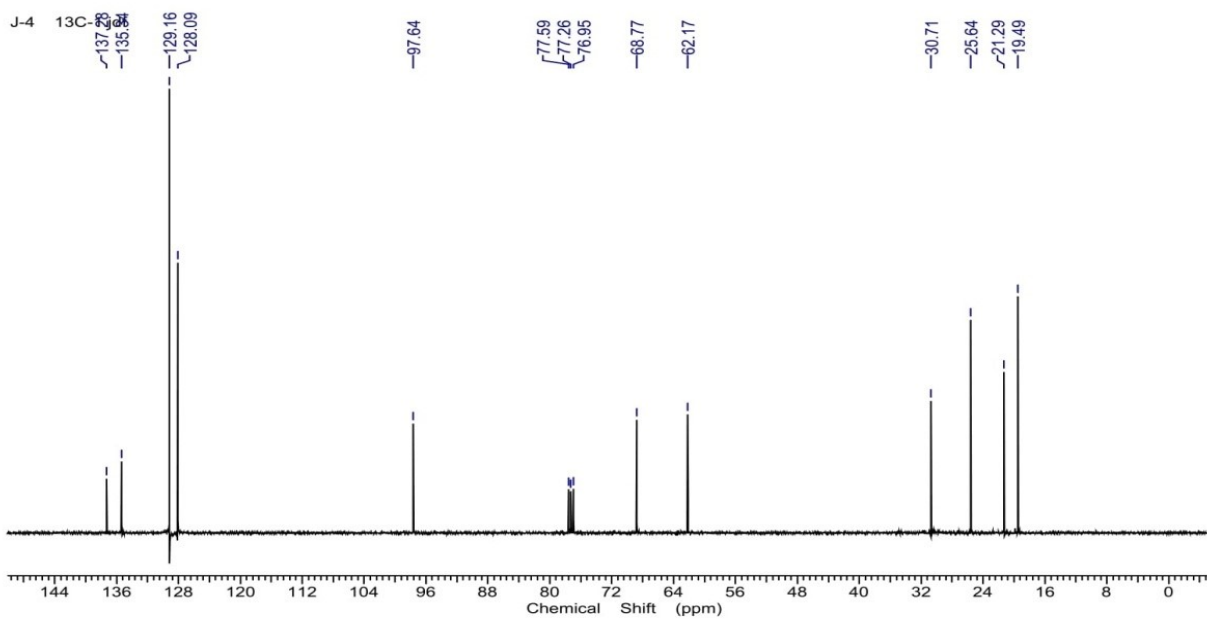

Fig :-  $^1\text{H}$  NMR and  $^{13}\text{C}$  spectra of 2-((4-methylbenzyl)oxy)tetrahydro-2H-pyran (Table 2, entry 2)

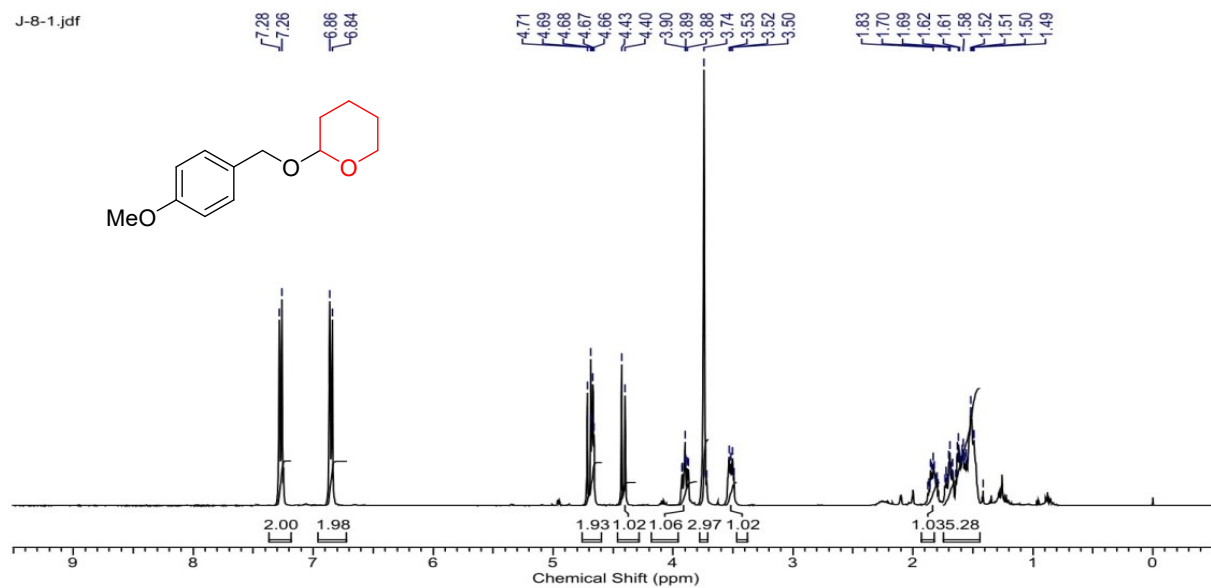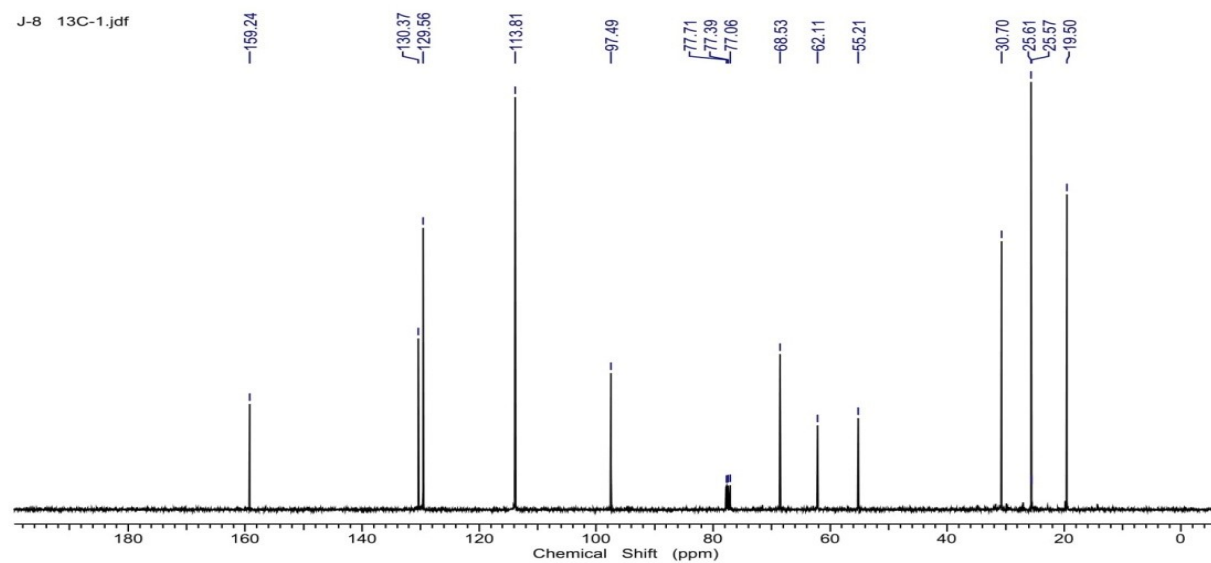

Fig :-  $^1\text{H}$  and  $^{13}\text{C}$  NMR spectra of 2-(4-methoxybenzyloxy)-tetrahydro-2H-pyran (Table 2, entry 3)

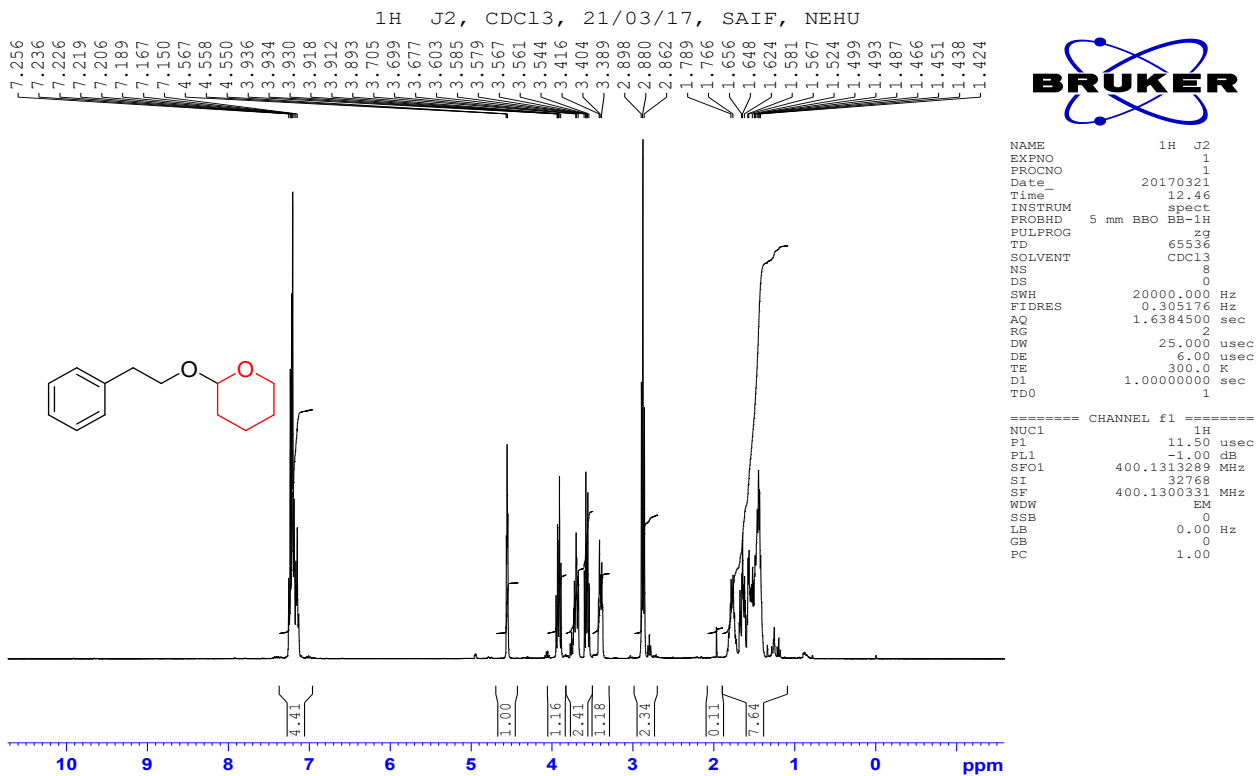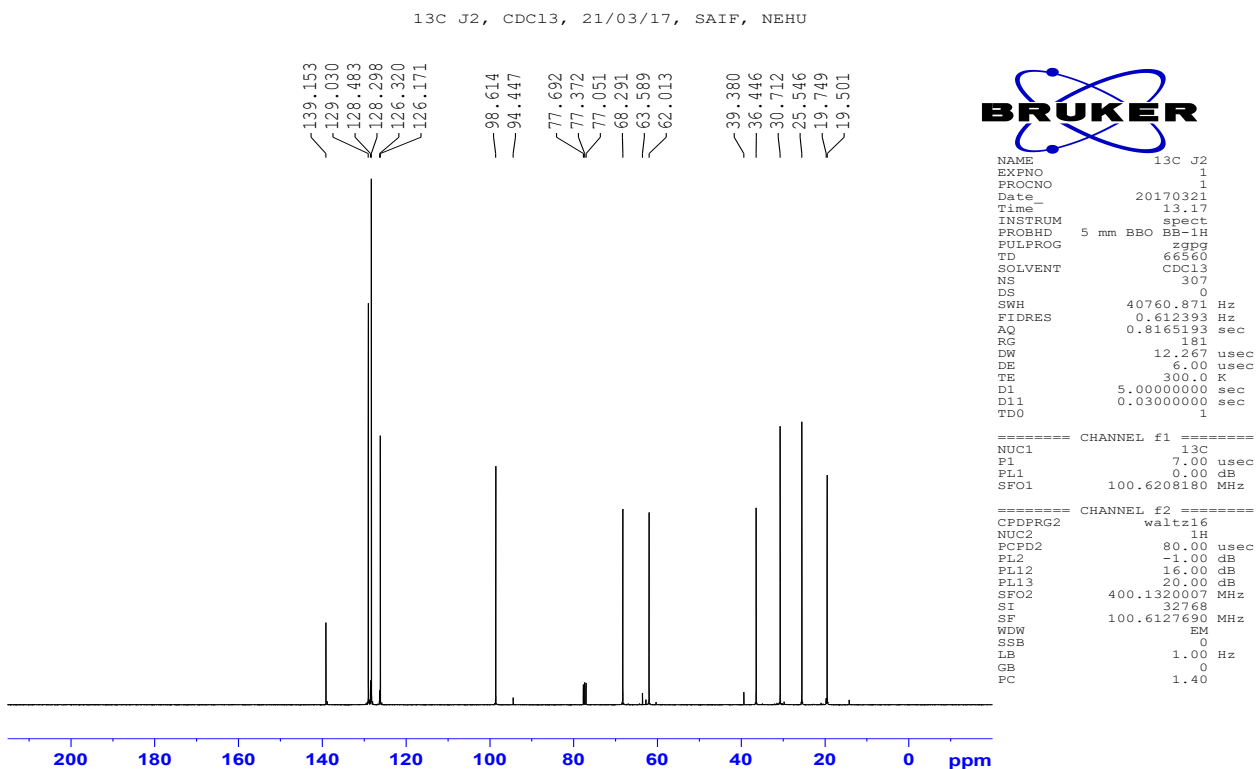

Fig :-  $^1\text{H}$  and  $^{13}\text{C}$  NMR spectra of tetrahydro-2-(phenethyloxy)-2H-pyran (Table 2, entry 6)

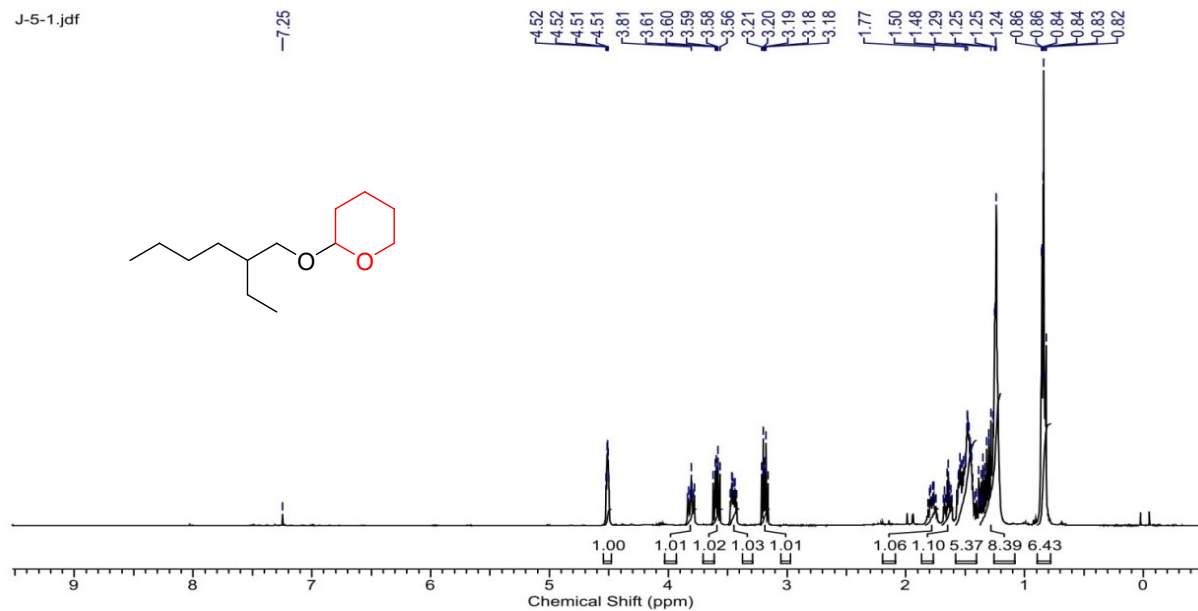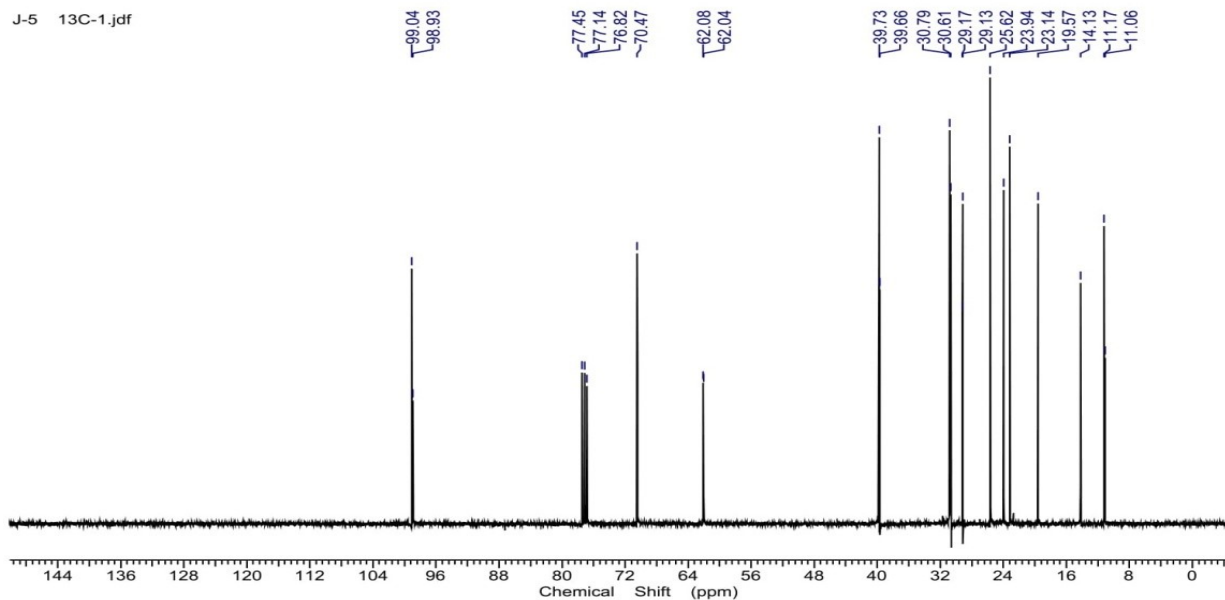

Fig :-  $^1\text{H}$  and  $^{13}\text{C}$  NMR spectra of 2-(2-ethylhexyloxy)-tetrahydro-2H-pyran (Table 2, entry 7)

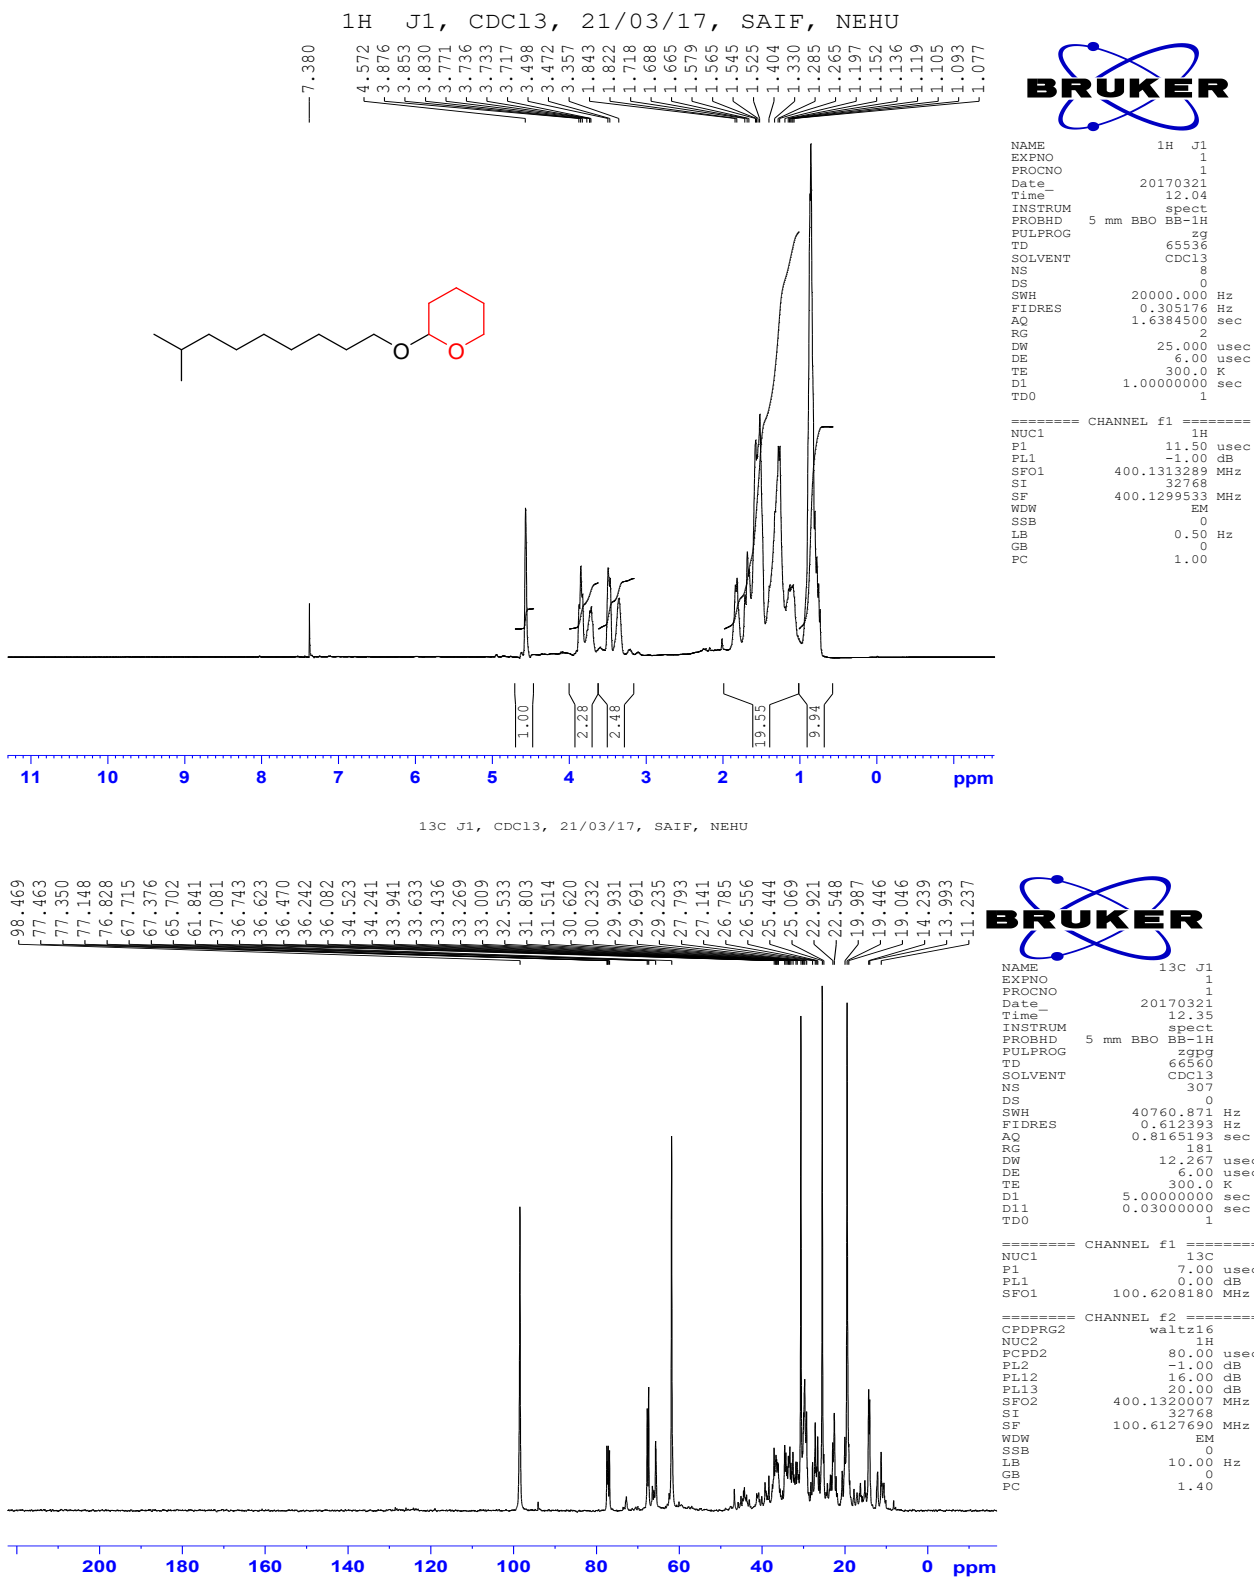

Fig :- <sup>1</sup>H and <sup>13</sup>C NMR spectra of 2-(8-methylnonyloxy)-tetrahydro-2H-pyran (Table 2, entry 8)

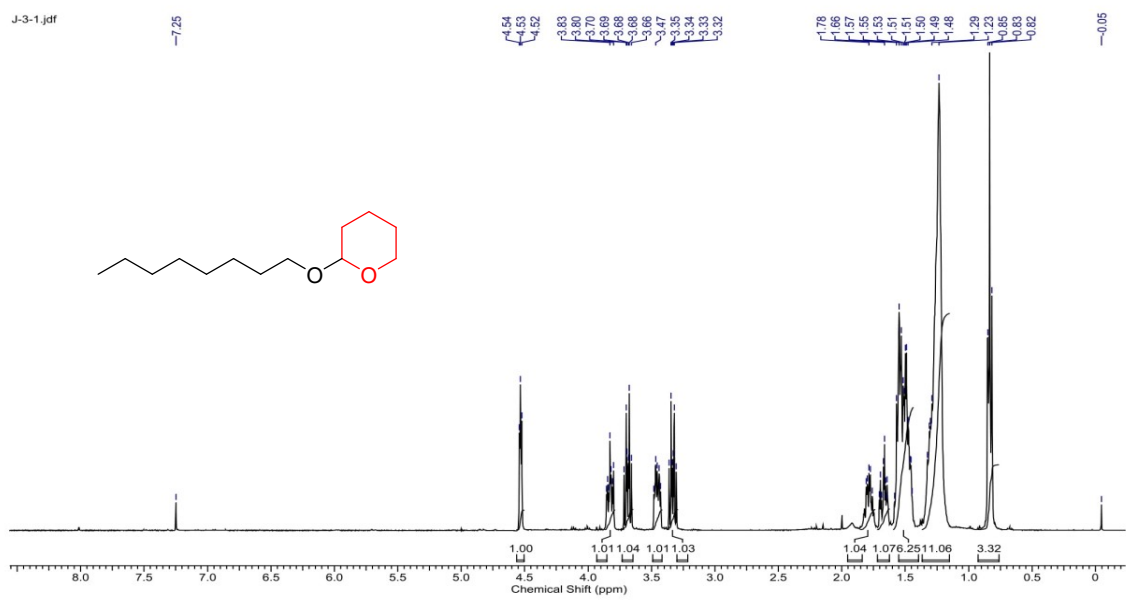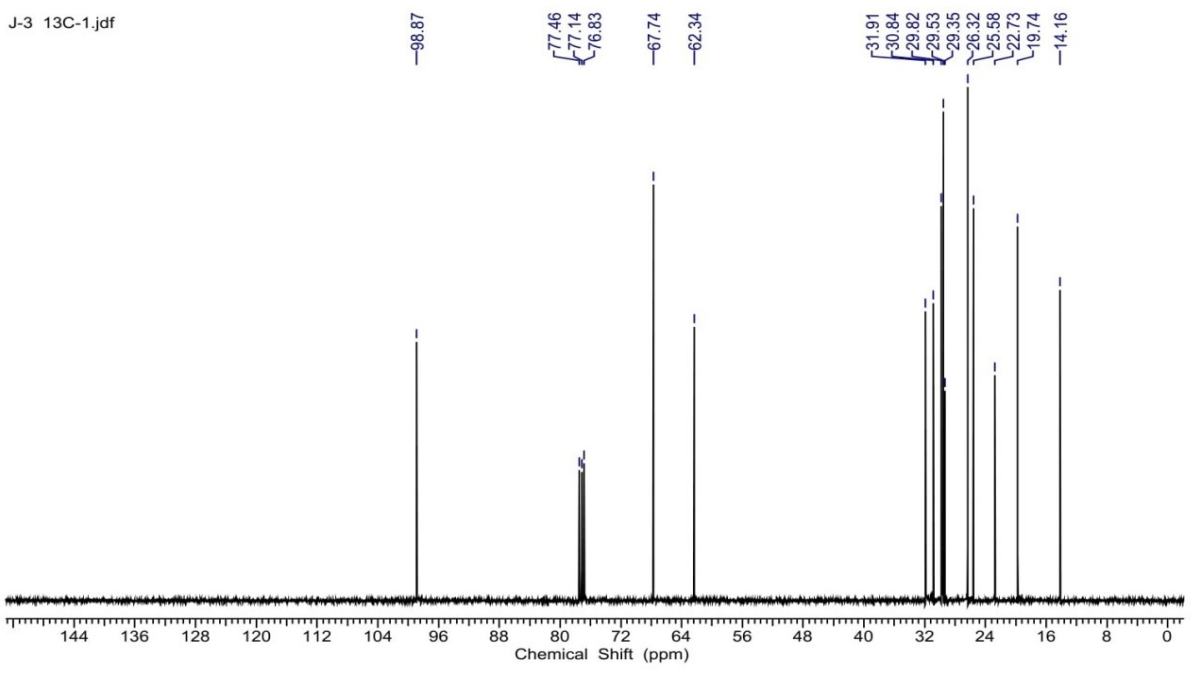

Fig :- <sup>1</sup>H and <sup>13</sup>C NMR spectra of 2-(octyloxy)tetrahydro-2H-pyran (Table 2, entry 9)
